1  
2  
3  
4  
5  
6  
7  
8  
9  
10  
11  
12  
13  
14  
15  
16  
17  
18  
19  
20  
21  
22

# West Nile virus-inclusive single-cell RNA sequencing reveals heterogeneity in the type I interferon response within single cells

Justin T. O'Neal<sup>a,b</sup>, Amit A. Upadhyay<sup>b,d</sup>, Amber Wolabaugh<sup>b,d</sup>, Nirav B. Patel<sup>c</sup>, Steven E. Bosinger<sup>b,c,d</sup>, Mehul S. Suthar<sup>a,b,#\*</sup>

<sup>a</sup>Department of Pediatrics, Division of Infectious Disease, Emory University School of Medicine, Atlanta, Georgia, USA

<sup>b</sup>Emory Vaccine Center, Yerkes National Primate Research Center, Atlanta, Georgia, USA

<sup>c</sup>Yerkes Genomics Core, Yerkes National Primate Research Center, Atlanta, Georgia, USA

<sup>d</sup>Department of Pathology and Lab Medicine, Emory University School of Medicine, Atlanta, Georgia, USA

Running Head: West Nile virus-inclusive single-cell RNA sequencing

#Address correspondence to Mehul S. Suthar, [mehul.s.suthar@emory.edu](mailto:mehul.s.suthar@emory.edu).

\*Present address: Yerkes National Primate Research Center, Atlanta, Georgia, USA.

Abstract: 232 words; Importance: 122 words; and Text: 4,850 words.

23 **ABSTRACT**

24 West Nile virus (WNV) is a neurotropic mosquito-borne flavivirus of global importance.  
25 Neuroinvasive WNV infection results in encephalitis and can lead to prolonged  
26 neurological impairment or death. Type I interferon (IFN-I) is crucial for promoting  
27 antiviral defenses through the induction of antiviral effectors, which function to restrict  
28 viral replication and spread. However, our understanding of the antiviral response to  
29 WNV infection is mostly derived from analysis of bulk cell populations. It is becoming  
30 increasingly apparent that substantial heterogeneity in cellular processes exists among  
31 individual cells, even within a seemingly homogenous cell population. Here, we present  
32 WNV-inclusive single-cell RNA sequencing (scRNA-seq), an approach to examine the  
33 transcriptional variation and viral RNA burden across single cells. We observed that  
34 only a few cells within the bulk population displayed robust transcription of IFN- $\beta$  mRNA,  
35 and this did not appear to depend on viral RNA abundance within the same cell.  
36 Furthermore, we observed considerable transcriptional heterogeneity in the IFN-I  
37 response, with genes displaying high unimodal and bimodal expression patterns.  
38 Broadly, IFN-stimulated genes negatively correlated with viral RNA abundance,  
39 corresponding with a precipitous decline in expression in cells with high viral RNA levels.  
40 Altogether, we demonstrated the feasibility and utility of WNV-inclusive scRNA-seq as a  
41 high-throughput technique for single-cell transcriptomics and WNV RNA detection. This  
42 approach can be implemented in other models to provide insights into the cellular  
43 features of protective immunity and identify novel therapeutic targets.

44

45

46 **IMPORTANCE**

47 West Nile virus (WNV) is a clinically relevant pathogen responsible for recurrent  
48 epidemics of neuroinvasive disease. Type I interferon is essential for promoting an  
49 antiviral response against WNV infection; however, it is unclear how heterogeneity in  
50 the antiviral response at the single-cell level impacts viral control. Specifically,  
51 conventional approaches lack the ability to distinguish differences across cells with  
52 varying viral abundance. The significance of our research is to demonstrate a new  
53 technique for studying WNV infection at the single-cell level. We discovered extensive  
54 variation in antiviral gene expression and viral abundance across cells. This protocol  
55 can be applied to primary cells or *in vivo* models to better understand the underlying  
56 cellular heterogeneity following WNV infection for the development of targeted  
57 therapeutic strategies.

58

59

60

## 61 INTRODUCTION

62 Mosquito-borne flaviviruses represent a significant public health burden, annually  
63 accounting for millions of infections worldwide that, in certain cases, can culminate in  
64 severe systemic or neuropathological outcomes (1-4). West Nile virus (WNV), a  
65 member of the *Flaviviridae* family, causes yearly epidemics of encephalitis and virus-  
66 induced myelitis on a global scale with nearly 50,000 reported cases of WNV disease  
67 and over 21,000 cases of neuroinvasive disease from 1999 to 2016 in the United States  
68 alone (1-4). Currently, there are no licensed vaccines or approved targeted therapeutics  
69 to prevent or treat WNV-infected patients, underscoring the need to better understand  
70 the cellular response to WNV infection (1-4).

71 Type I IFN (IFN- $\alpha/\beta$  or IFN-I) is the first line of defense against viral infection and  
72 coordinates the early antiviral programs to restrict viral replication, as well as shape the  
73 adaptive immune response (5-14). Loss of IFN-I signaling in WNV-infected mice results  
74 in uncontrolled viral replication and rapid mortality, demonstrating that the IFN-I  
75 response is required for protective immunity (9, 11, 14, 15). Pattern recognition  
76 receptors, including toll-like receptors (TLRs) and retinoic acid-inducible gene I (RIG-I)-  
77 like receptors (RLRs), detect broad viral signatures, such as 5'-triphosphate ssRNA or  
78 dsRNA, in the cytosolic and endosomal compartments (9, 11, 12, 14). For flavivirus  
79 infection, RLRs are critical for inducing IFN-I and binding to cytosolic viral RNA signals  
80 through adaptor proteins, such as mitochondrial antiviral signaling protein (MAVS), to  
81 activate transcription factors and induce interferon regulatory factor (IRF)-mediated  
82 transcription of IFN- $\beta$  (*Ifnb1*) and a subset of IFN-stimulated genes (ISGs) (9, 11, 12, 14,  
83 16-22). Signaling in both an autocrine and paracrine manner, secreted IFN- $\beta$  binds IFN-

84 I receptor (IFNAR1/2 heterodimer) to activate Janus kinases, Jak1 and Tyk2, which  
85 phosphorylate signal transducer and activator of transcription 1 (STAT1) and STAT2 (7,  
86 9, 10, 12, 18-21, 23-27). Phosphorylated STAT1 and STAT2 form a heterodimer and  
87 recruit IRF9 to form the ISG factor 3 (ISGF3) complex. The ISGF3 complex then  
88 translocates to the nucleus and induces IFN-stimulated response element (ISRE)-  
89 regulated genes, thereby reshaping the cellular landscape to an antiviral state (5, 7, 9,  
90 12, 18-21, 23-28).

91           The induction of IFN-I and ISGs within a bulk population of infected cells has  
92 been well characterized. However, mean values obtained via conventional bulk assays  
93 mask transcriptional differences between infected and bystander cells and obscure any  
94 heterogeneity present within the infected population. Recently, single-cell studies have  
95 examined the heterogeneity across virally infected cells. Findings with influenza virus,  
96 poliovirus, dengue virus (DENV) and Zika virus (ZIKV) have revealed extensive  
97 variation in viral RNA abundance within single cells (29-31). Using high dimensional  
98 mass cytometry by time-of-flight (CyTOF) analysis, others have described differences in  
99 IFN-induced and pro-inflammatory cytokine production in infected and bystander human  
100 dendritic cells following DENV infection (32). Studies examining IFN-I induction at the  
101 single-cell level have used fluorescently-tagged cells, single-mRNA molecule *in situ*  
102 hybridization, single-cell quantitative PCR (qPCR), and single-cell RNA sequencing  
103 (scRNA-seq) (16-19, 27, 33). Previous studies have found that only a small fraction of  
104 infected cells express *Ifnb1* mRNA (17-19, 27). This is thought to be attributable to  
105 stochasticity in signaling components and downstream signaling cascades leading to  
106 transcription factor activation or variability in the processes of *Ifnb1* expression, perhaps

107 at the level of chromatin organization (16-19, 34-36). Using PRR agonists or  
108 nonproductive viral infection, others have demonstrated that IFN-I-dependent paracrine  
109 signaling is pivotal in amplifying the host antiviral response (16-19, 26, 27). Lastly,  
110 single-cell transcriptomic studies have also been used to globally investigate virus-host  
111 interactions and identify novel candidate genes for host-targeted therapeutics (31).  
112 Knockdown screens or knockout studies can only probe a subset of nonessential host  
113 genes, limiting their scope (37-42). However, virus-inclusive scRNA-seq is a powerful  
114 platform for the discovery of novel proviral and antiviral candidate genes in an unbiased  
115 manner as recently highlighted by Zanini and colleagues with DENV and ZIKV (31).

116         Altogether, these studies have shed considerable light on the transcriptional  
117 differences present in single cells, and specifically with *Ifnb1* expression and viral RNA  
118 abundance. However, we still lack a thorough understanding of the cellular  
119 heterogeneity in the IFN-I response following WNV infection. Population-level  
120 transcriptional analyses are valuable and widely used approaches, but in certain cases  
121 can belie gene expression patterns, such as bimodal variation, which can only be  
122 observed at single-cell resolution (18, 27, 33). To better understand the underlying  
123 transcriptional differences across cells with varying viral abundance, we developed  
124 WNV-inclusive scRNA-seq, a modified SMART-Seq protocol that incorporates a virus-  
125 specific primer for parallel recovery of host messenger RNA (mRNA) and viral RNA  
126 from single cells. We found that only a small fraction of cells exhibited robust *Ifnb1*  
127 expression, and this did not significantly correlate with high viral RNA. We observed  
128 considerable transcriptional heterogeneity in ISG expression and viral RNA abundance  
129 across cells. ISGs exhibited both unimodal and bimodal variation and were negatively

130 correlated with intracellular viral RNA, displaying a steep decline in gene expression  
131 with increasing viral abundance. Combining single-cell mRNA sequencing with  
132 quantification of non-polyadenylated viral RNA, we present WNV-inclusive scRNA-seq  
133 as a high-throughput technique for single-cell transcriptome analysis of WNV-infected  
134 cells.

135

136

137

## 138 **RESULTS**

139 **Population-level analysis of WNV infection in murine fibroblast L929 cells.** We first  
140 modeled WNV infection kinetics in murine fibroblast L929 cells, an IFN-competent cell  
141 line extensively used to study IFN-I-dependent signaling (19, 43). Cells were infected at  
142 a multiplicity of infection (MOI) of 0.1, 1 or 10, as determined on BHK-21 cells, and  
143 intracellular viral envelope (E) protein immunostaining was performed at 6, 12, 24 and  
144 48 hr post-infection. Infected cells were labeled with WNV E16 antibody (Ab), which  
145 recognizes a domain III (DIII) neutralizing epitope within the E protein (44). For all three  
146 MOIs, nearly 100% of cells stained positive for intracellular viral E protein by 48 hr post-  
147 infection (Fig. 1A). At a MOI of 10, intracellular viral E protein was detected in nearly  
148 100% of cells as early as 24 hr post-infection, suggesting that the majority of these cells  
149 were likely infected during primary virus adsorption (Fig. 1A). For cells infected at a MOI  
150 of 1, intracellular viral E protein was detected in approximately 60% of cells at 24 hr  
151 post-infection (Fig. 1A).

152 To diminish asynchronous second-round infection, cells were infected with WNV  
153 (MOI of 1) and incubated in the presence of WNV E16 neutralizing Ab. Inoculation with  
154 UV-inactivated WNV served as a non-replicating input control for internalized viral RNA,  
155 and no expression of viral E protein was detected (Fig. 1B, 1C). Notably, limiting *in vitro*  
156 spread resulted in a 5.5-fold decrease in the percentage of viral E protein-positive cells  
157 (10.6%) at 24 hr post-infection, corresponding with a comparable 5.2-fold reduction in  
158 viral RNA levels (Fig. 1B, 1C). Collectively, these two conditions, WNV and WNV (+Ab),  
159 provide a cell population with a range of viral abundance and another of predominantly



160 bystander cells with which to survey the IFN-I response at the population and single-cell  
161 level in all subsequent analyses.

162 Before pursuing a single-cell approach, we next sought to evaluate  
163 transcriptional changes following WNV infection at the population level by bulk RNA-seq.  
164 As expected, numerous genes associated with the innate immune response and  
165 antiviral defense response were up-regulated following infection (Fig. 1D, 1E).  
166 Furthermore, the majority of these genes were expressed at similar levels independent  
167 of reduced asynchronous second-round infection (Fig. 1D, 1E). ISGs and PRR genes  
168 exhibited a more consistent level of mean gene expression across these two conditions  
169 (Fig. 1E). Conversely, IFN-I and cytokine genes displayed the most variability in  
170 expression between genes within their respective categories (Fig. 1E). Most notably,  
171 *Ifna2* and *Ifna5* displayed around two-fold higher levels of expression when allowing for  
172 *in vitro* spread, although *Ifna2* dropped outside of the pre-selected significance cutoff ( $p$   
173  $< 0.01$ ; Fig. 1E, 1F). This population-level analysis provides a contextual fundamental  
174 framework from which to build as we examine the transcriptional differences observed  
175 across single cells. Leveraging single-cell sequencing techniques complemented with  
176 viral RNA detection, we next extended the resolution of our analysis to single cells to  
177 better understand the underlying transcriptional heterogeneity present following WNV  
178 infection.

179

180 **WNV-inclusive scRNA-seq captures mRNA and viral RNA from single cells.** WNV-  
181 inclusive scRNA-seq is adapted from the well-established Smart-seq2 protocol (45) and  
182 the commercially available SMART-Seq v4 Ultra Low Input RNA Kit (Takara) used for

183 scRNA-seq. The SMART-Seq v4 protocol is modified to include a virus-specific primer  
184 (WNV SC primer) during the reverse transcription (RT) step. For scRNA-seq analysis,  
185 L929 cells are inoculated with virus for 1 hr at a MOI of 1 and then incubated in the  
186 presence or absence of WNV E16 neutralizing Ab (44) for 24 hr (Fig. 2A). Viable single  
187 cells are sorted by conventional flow cytometry into 96-well plates containing 10  $\mu$ L lysis  
188 buffer per well (Fig. 2B). In the RT reaction, 3' SMART-Seq CDS Primer II A (30-  
189 nucleotide poly-dT sequence with a 5' 25-nucleotide ISPCR universal anchor sequence  
190 (45)) and WNV SC primer (21-nucleotide sequence complementary to positive-strand  
191 viral RNA with a 5' 25-nucleotide ISPCR universal anchor sequence (45)) are added to  
192 capture host transcripts and viral RNA, respectively (Fig. 2C). Following template  
193 switching, PCR Primer II A served as the primer for parallel downstream amplification of  
194 both host and viral complementary DNA (cDNA) (Fig. 2C). Samples underwent Nextera  
195 tagmentation and were sequenced on an Illumina HiSeq at a depth of approximately 1  
196 million reads per cell (27, 46). Altogether, we successfully captured and profiled a total  
197 of 127 cells across three conditions: Mock, WNV, and WNV (+Ab). The outlined  
198 approach delivers exceptional coverage and sequencing depth allowing for accurate  
199 quantification of host transcripts and non-polyadenylated viral RNA.

200       Viral RNA was successfully recovered from single cells following WNV infection,  
201 and the majority of WNV reads were aligned with the targeted region of the WNV  
202 genome (Fig. 2D). To ensure that the addition of WNV SC primer did not adversely  
203 affect the recovery of host mRNAs, the concentration of WNV SC primer was carefully  
204 titrated and cDNA quality was evaluated on an Agilent 2100 Bioanalyzer  
205 (Supplementary Fig. 1). Furthermore, we examined the levels of housekeeping genes

206 (*Gapdh*, *Rpl5*, *Arf1* and *Pgk1*) across cells in all three conditions: Mock, WNV, and  
207 WNV (+Ab). Unsurprisingly, expression of housekeeping genes was not significantly  
208 different between mock and infected conditions, demonstrating that amplification of viral  
209 RNA does not impair recovery of host mRNA (Fig. 2E).

210

### 211 **Heterogeneity in viral RNA abundance and ISG induction at single-cell resolution.**

212 At the single-cell level, we observed large differences in viral RNA abundance in the  
213 presence and absence of limited *in vitro* spread (Fig. 2D). In the absence of neutralizing  
214 antibody, we detected a wide range of intracellular viral RNA levels, with the majority of  
215 cells having greater than  $2^{10}$  viral RNA counts per million transcripts (Fig. 2D).  
216 Interestingly, only 24% of cells had greater than  $2^{10}$  viral RNA counts per million  
217 transcripts when limiting asynchronous secondary infection (Fig. 2D). Furthermore, the  
218 heterogeneity of viral RNA abundance in the presence of neutralizing antibody suggests  
219 that there is variability in WNV replication during the primary round of infection (Fig. 2D).  
220 Notably, the percentage of single cells positive for viral RNA (Fig. 2D) is significantly  
221 higher than the percentage predicted by flow cytometry-based viral E protein  
222 immunostaining for both infection conditions (Fig. 1B).

223         When examining transcriptional dynamics across single cells, we noticed some  
224 interesting trends. Only a small fraction of WNV-infected cells produced greater than  $2^5$   
225 *Ifnb1* counts per million transcripts (Fig. 3A). Intriguingly, we observed a similar  
226 expression signature for *Ifna4* and *Ifna2* despite high levels of *Irf7*, a transcription factor  
227 that drives IFN- $\alpha$  production (47-49), in the majority of cells (Fig. 3A). Furthermore, we  
228 identified three chemokine genes (*Ccl5*, *Ccl4* and *Cxcl11*) that displayed comparable

229 cellular distributions to IFN-I genes. Other pro-inflammatory cytokine genes, *Cxcl10*, *Tnf*,  
230 *Il6* and *Il23a*, exhibited cellular heterogeneity but still maintained a portion of cells with  
231 no detectable transcript. Genes *Ddx58* and *Dhx58*, which respectively encode the RLRs  
232 RIG-I and LGP2 (Laboratory of Genetics and Physiology 2), were highly expressed with  
233 most cells containing greater than  $2^5$  counts per million transcripts (Fig. 3B).  
234 Interestingly, *Tlr3* and *Ifih1*, another important RLR gene that encodes MDA5  
235 (melanoma differentiation-associated gene 5), displayed greater variation in expression  
236 across cells, including a fraction with no detectable transcript (Fig. 3B). Components of  
237 the ISGF3 complex (*Irf9*, *Stat1* and *Stat2*) are critical for IFN-I signaling and are induced  
238 to greater than  $2^5$  counts per million transcripts in the majority of cells (Fig. 3B). Next,  
239 we sought to examine the expression patterns for a panel of experimentally validated  
240 WNV-targeting antiviral effector genes (*Rsad2*, *Tnfsf10*, *Ifi44l*, *Oas1b*, *Oas3*, *Ifitm3*,  
241 *Eif2ak2* and *Mov10*) and two well-established ISGs (*Ifit3* and *Mx1*) (26, 42, 50-58).  
242 Antiviral effector genes feature both unimodal (*Tnfsf10*, *Ifi44l*, *Ifitm3*, *Eif2ak2*, *Mov10*  
243 and *Mx1*) and bimodal (*Rsad2*, *Oas1b*, *Oas3* and *Ifit3*) variation across single cells (Fig.  
244 4). Notably, several genes (*Ddx58*, *Tlr3*, *Stat1*, *Tnfsf10*, *Eif2ak2*, *Ifit3* and *Mx1*) revealed  
245 significantly different transcriptional signatures across cells with and without limited *in*  
246 *vitro* spread (Fig. 3B, 4). Strikingly, most cells have no detectable reads for *Tnfsf10* and  
247 *Mx1* when allowing for *in vitro* spread; however, in the presence of neutralizing Ab, the  
248 inverse is true (Fig. 4).

249

250 **Correlation between host gene expression and viral RNA abundance for single**  
251 **cells.** Building upon our ability to assess viral RNA abundance in single cells, we

252 calculated Spearman's correlation coefficients for host gene expression and viral RNA  
253 burden across all WNV cells, which spanned a range of viral RNA levels. To  
254 comprehensively identify pathways that might be linked to viral RNA abundance, we  
255 performed gene ontology (GO) enrichment analysis using the online bioinformatics tool  
256 DAVID (59, 60), wherein we independently evaluated all positively correlated ( $\rho > 0.35$ )  
257 and negatively correlated ( $\rho < -0.35$ ) genes of significance ( $p < 0.001$ ). The top  
258 pathways extracted from the GO enrichment analysis for negatively correlated genes  
259 were the antiviral defense response, cellular response to IFN- $\beta$ , response to virus,  
260 negative regulation of viral replication, innate immune response and antigen processing  
261 and presentation via MHC I (class I major histocompatibility complex molecule) (Fig.  
262 5A). For the positively correlated gene set, the top pathways included transcriptional  
263 regulation, amino acid transport, ribosomal RNA (rRNA) processing, regulation of  
264 protein ubiquitination and ER stress response, providing a broad description of viral  
265 RNA-correlated genes (Fig. 5A). Next using curated gene lists from published large-  
266 scale ISG screen and single-cell transcriptomic studies (26, 61, 62), we examined the  
267 distribution of correlation coefficients for ISGs and cell cycle-associated genes  
268 subdivided by phase (G1/S, S, G2/M, M and M/G1). Predictably, the majority of genes  
269 do not correlate with viral RNA abundance, and the distribution of coefficients skews  
270 heavily towards zero (Fig. 5B). When assessing viral RNA correlations for cell cycle-  
271 associated genes, most genes were not significantly positively or negatively correlated,  
272 although minor shifts were observed for S, M and M/G1 phase genes (Fig. 5B).  
273 Interestingly, 124 out of 294 ISGs were negatively correlated with viral RNA  
274 corresponding with a dramatic shift in the coefficient distribution (Fig. 5B). As predicted

275 by the GO enrichment analysis, numerous genes associated with the ER stress  
276 response (*Gadd45a*, *Ppp1r15a*, *Selenos*, *Ddit3*, *Atf4* and others) were strongly  
277 positively correlated with viral abundance (Fig. 5B). A subset of correlated ISGs and  
278 panel of non-correlated cytokine genes are represented in a correlation matrix (Fig. 5C).  
279 Negatively correlated ISGs strongly clustered together with high correlation coefficients  
280 approaching 1 (Fig. 5C). Conversely, ISGs positively correlated with viral RNA only  
281 weakly correlated with other positively correlated ISGs (Fig. 5C). Many cells expressing  
282 high levels of IFN-I and pro-inflammatory cytokines also featured elevated viral  
283 abundance, but not to the extent of reaching significant positive correlation (Fig. 5C).  
284 Scatter plots were generated for a subset of viral RNA-correlated genes and collated in  
285 order of increasing correlation coefficients (Fig. 6). Trends associated with negatively  
286 correlated ISGs mostly featured a precipitous decline in gene expression as viral RNA  
287 levels in single cells exceeded around  $2^{15}$  counts per million transcripts (Fig. 6).  
288 Alternatively, positively correlated genes often were characterized by slopes near or  
289 less than 1 (Fig. 6). For WNV-validated antiviral effector genes (*Rsad2*, *Tnfsf10*, *Ifi44l*,  
290 *Oas1b*, *Oas3*, *Ifitm3*, *Eif2ak2* and *Mov10*), all genes are negatively correlated with viral  
291 RNA as expected (Fig. 6). Interestingly, *Tnfsf10*, *Ifi44l* and *Mx1* present unique  
292 correlation trends with viral RNA in that the cells with the highest viral abundance have  
293 no detectable transcripts for these genes (Fig. 6).

294

295

## 296 **DISCUSSION**

297 Standard scRNA-seq protocols with oligo-dT-based priming have been used to examine  
298 transcriptional dynamics during viral infection, but the unique genomic structure of  
299 flaviviruses, and other non-polyadenylated viruses that are clinically important  
300 pathogens, represents a distinct hurdle for such studies (29). We have independently  
301 developed and demonstrated the feasibility of WNV-inclusive scRNA-seq as an  
302 attractive approach for the quantification of host transcripts and viral RNA within single  
303 cells. This protocol, in combination with previously published work by Zanini and  
304 colleagues (31), establishes virus-inclusive scRNA-seq as a viable and tractable system  
305 for other non-polyadenylated RNA viruses.

306 WNV-inclusive scRNA-seq revealed extensive transcriptional heterogeneity in  
307 viral RNA abundance and the IFN-I response across single cells (Fig. 2D, 3, 4). The  
308 majority of WNV reads mapped to the targeted region of the WNV genome (Fig. 2D).  
309 However, minimal non-random background was observed in Mock cells with a median  
310 value of 45 WNV CPM for Mock cells, as compared to 37246 WNV CPM for WNV cells.  
311 This background may result from index hopping (63), and could be accounted for in  
312 subsequent iterations by using unique indexes. In support of published findings (17-19,  
313 27), we found that few cells produce IFN- $\beta$  transcript following viral infection (Fig. 3A).  
314 However, we observed a strong induction of numerous ISGs (*Irf7*, *Ddx58*, *Dhx58*, *Irf9*,  
315 *Stat1* and *Stat2*) with high unimodal expression signatures (Fig. 3), highlighting the well-  
316 established importance of IFN-I-dependent paracrine signaling (16-19, 26, 27).  
317 Interestingly, we saw a bifurcation in ISG correlations with viral RNA, wherein 124 out of  
318 294 ISGs were negatively correlated with intracellular viral abundance (Fig. 5B).

319 Furthermore, a considerable fraction of ISGs featured a precipitous downward trend in  
320 expression with increasing viral RNA, dissimilar to the gradual upward trend exhibited  
321 by positively correlated genes (Fig. 6). Collectively, these findings are reflective of the  
322 dynamic balance and interplay between host and viral factors within a single cell. This  
323 represents the first single-cell transcriptomics study of flavivirus infection to examine the  
324 correlation of ISGs with intracellular viral RNA. To extend this arm of our analysis, we  
325 examined WNV-targeting antiviral effector genes that have been previously validated  
326 through short hairpin RNA (shRNA) and small interfering RNA (siRNA) knockdown  
327 screens, cell-based overexpression assays and *in vivo* knockout models (26, 42, 50-58).  
328 These validated antiviral effector genes exhibited both unimodal (*Tnfrsf10*, *Ifi44l*, *Ifitm3*,  
329 *Eif2ak2* and *Mov10*) and bimodal (*Rsad2*, *Oas1b* and *Oas3*) expression patterns and all  
330 negatively correlated with viral RNA (Fig. 4, 6), demonstrating the technical capacity of  
331 WNV-inclusive scRNA-seq to probe virus-host interactions and identify novel antiviral  
332 candidate genes.

333         The discovery that bimodal variation in IFN-stimulated genes (ISGs) correlates  
334 with viral RNA abundance (Fig. 4, 6) bears notable relevance to previous work  
335 examining WNV antagonism of IFN-I signaling. WNV, among other flaviviruses, directly  
336 or indirectly antagonizes IFN-I signaling and the JAK-STAT pathway to counter cellular  
337 antiviral defenses (64-68). The WNV nonstructural protein NS5 blocks Jak1 and Tyk2  
338 activation by interacting with prolidase to inhibit surface expression of IFNAR1 (10, 64).  
339 Additionally, WNV recruits plasma membrane-derived cholesterol to replication sites in  
340 the ER, and NS4A and NS4B contribute to membrane rearrangement and associated  
341 ER stress, which are all thought to interfere with JAK-STAT signaling (64, 69-71).



342 Bimodal ISG expression patterns correlated with viral abundance (Fig. 4, 6) may result  
343 from viral antagonism in primary infected cells allowing for higher replication. This is  
344 supported by the almost uniformly high expression observed for ISGs when limiting *in*  
345 *vitro* spread (Fig. 4), a cell population with a predominantly low-level of WNV replication  
346 (Fig. 2D). Alternatively, bimodality may arise from preexisting cell-intrinsic differences,  
347 such as the level of critical signaling components, specifically at the initial stage of  
348 infection.

349 WNV-inclusive scRNA-seq provides a single-cell transcriptomics protocol to  
350 probe cellular heterogeneity in the host response and quantify viral RNA. The outlined  
351 approach can potentially serve as a valuable tool for *in vivo* studies to examine cell-  
352 intrinsic responses to viral infection, extending the resolution to infected single cells.  
353 Such studies can also leverage the added ability with this approach to screen for  
354 infected cells by qPCR and cherry pick cDNA for sequencing to mitigate cost. Our study  
355 demonstrates the feasibility and utility of WNV-inclusive scRNA-seq as a high-  
356 throughput technique for single-cell transcriptomics and viral RNA detection, which can  
357 be used to provide insights into the cellular features of protective immunity.

358

359

360 **MATERIALS AND METHODS**

361 **Cells and viruses.** Murine fibroblast L929 cells were obtained from ATCC and grown at  
362 37°C with 5% CO<sub>2</sub> in DMEM (Corning) supplemented with 10% heat-inactivated FBS,  
363 2mM L-glutamine (Corning), 25 mM HEPES buffer (Corning), 1mM sodium pyruvate  
364 (Corning), MEM nonessential amino acids (Corning) and antibiotics/antimycotics  
365 (Corning). WNV isolate Texas 2002-HC (WNV-TX) has been previously described (3,  
366 72, 73), and its titer was determined by standard plaque assay on BHK-21 cells.  
367 Working stocks were generated by passaging WNV-TX twice on Vero cells (ATCC  
368 CCL81) and used for *in vitro* experiments. WNV was incubated directly under ultraviolet  
369 (UV) light for 1 hr to generate UV-inactivated WNV, which was confirmed by plaque  
370 assay prior to use.

371

372 **Infection and antibody treatment.** L929 cells were plated to 70-80% confluent and  
373 infected with WNV-TX at different MOIs (0.1, 1 or 10). Following a 1 hr virus adsorption  
374 period at 37°C, cells were washed once with complete DMEM (cDMEM) and  
375 subsequently incubated for 6-48 hr with cDMEM or cDMEM supplemented with WNV  
376 E16 neutralizing antibody (5 µg/mL), a gift from Michael Diamond (Washington  
377 University, St. Louis, Missouri) (44). Cells were trypsinized for flow staining or lysed for  
378 RNA at 6, 12, 24 or 48 hr post-infection. Antibody titration in supplemental media was  
379 performed at multiple MOIs (0.1, 1 or 10) for 48 hr post-infection to determine the  
380 optimal concentration to considerably reduce *in vitro* spread prior to use.

381

382 **Flow cytometry.** Conditions were run in biological triplicate samples. Cells were treated  
383 with 0.125% trypsin in PBS for 5 min at 37°C. All centrifugation steps were performed at  
384 1250 rotations per minute for 5 min at 4°C. Cells were pelleted, resuspended in FACS  
385 buffer (1x PBS, 1% FBS, 1 mM EDTA), and blocked for 10 min on ice with anti-mouse  
386 Fc Shield (TONBO Biosciences) at 0.5 µL per sample in FACS buffer. Subsequently,  
387 samples were stained for 20 min on ice with Ghost 780 viability dye (TONBO  
388 Biosciences) at 0.1 µL per sample in PBS. Samples were washed and resuspended in  
389 FACS buffer. For WNV E protein staining, samples were fixed following viability staining  
390 with 1x Transcription Factor Fix/Perm (diluted in Transcription Factor Fix/Perm Diluent;  
391 TONBO Biosciences) for 20 min on ice and washed twice with 1x Flow Cytometry Perm  
392 Buffer (diluted in ddH<sub>2</sub>O; TONBO Biosciences). WNV E16 antibody was conjugated to  
393 Allophycocyanin (APC) using the Lightning-Link APC Antibody Labeling Kit (Novus  
394 Biologicals). Samples were stained with APC-conjugated WNV E16 antibody at 0.25 µg  
395 per sample in Flow Cytometry Perm Buffer for 30 min on ice. Samples were washed,  
396 resuspended in FACS buffer, and run on a BD LSR II flow cytometer.

397

398 **Single-cell sorting.** Cells were stained with Ghost 780 viability dye (TONBO  
399 Biosciences) as stated above and filtered through a 35 µm strainer into a 5 mL FACS  
400 tube. Single viable cells were sorted into skirted 96-well PCR plates containing 10 µL  
401 RLT buffer (Qiagen) with 2-β-mercaptoethanol (1:100) per well using a BSL-3 level  
402 BD Aria II flow cytometer.

403

404 **Quantitative RT-PCR (qPCR).** Time-matched mock and WNV-infected L929 cells (1 ×  
405 10<sup>5</sup> cells per condition; in triplicate) were lysed in RNA Lysis Buffer. Total RNA was  
406 isolated from cells using the Quick-RNA MiniPrep Kit (Zymo Research). Purified RNA  
407 was reverse transcribed using random primers with the High-Capacity cDNA Reverse  
408 Transcription Kit (Applied Biosystems). WNV RNA levels were quantified by qPCR  
409 using PrimeTime Gene Expression Master Mix (Integrated DNA Technologies), WNV-  
410 specific primers and probe set, and TaqMan gene expression assay (ThermoFisher) for  
411 the host gene *Gapdh* (Mm99999915\_g1). WNV-specific primer and probe sequences  
412 (Forward primer: 5' – TCAGCGATCTCTCCACCAAAG – 3'; Reverse primer: 5' –  
413 GGGTCAGCACGTTTGTTCATTG – 3'; and Probe: 5' – 6FAM-TGCCCGACC-  
414 ATGGGAGAAGCTC-MGB – 3') were adapted from Lanciotti and colleagues (73) and  
415 correspond to WNV isolate Texas 2002-HC (GenBank accession number: DQ176637.1).  
416 C<sub>T</sub> values were normalized to the reference gene *Gapdh* and represented as fold  
417 change over time-matched mock values using the formula 2<sup>-ΔΔCT</sup>. All primers and probes  
418 were purchased from Integrated DNA Technologies (IDT). qPCR was performed in 384-  
419 well plates and run on an Applied Biosystems 7900 HT Real-Time PCR System.

420

421 **Bulk mRNA sequencing (RNA-seq).** L929 cells were infected with WNV (MOI of 1)  
422 and incubated in the absence or presence (+Ab) of WNV E16 neutralizing Ab. In  
423 biological triplicate (n = 3), 50,000 viable cells were sorted into 100 μL RLT buffer  
424 (Qiagen) with 2-betamercaptoethanol (1:100) at 24 hr post-infection for each condition:  
425 time-matched mock, WNV and WNV (+Ab). mRNA sequencing libraries were prepared  
426 at Yerkes Genomics Core ([http://www.yerkes.emory.edu/nhp\\_genomics\\_core/](http://www.yerkes.emory.edu/nhp_genomics_core/)), and the

427 quality of the libraries was verified using DNA-1000 Kits (Agilent Bioanalyzer) and  
428 quantified using the Qubit 2.0 Fluorometer (LifeTechnologies). Libraries were clustered  
429 and sequenced on an Illumina HiSeq (100 bp single-end reads). Sequencing reads  
430 were mapped to the GENCODE mouse reference genome (GRCm38.p5 Release M16).  
431 Reads were normalized and differential expression analysis performed using DESeq2  
432 (74). Normalized reads were expressed as fold change over time-matched mock values.  
433

434 **Single-cell RNA sequencing (scRNA-seq).** SMART-Seq v4 Ultra Low Input RNA Kit  
435 (Takara) was used for cDNA preparation. The protocol was modified to include a WNV-  
436 specific viral primer during the RT step. WNV SC primer (5' –  
437 AAGCAGTGGTATCAACGCAGAGTACGGGTCAGCACGTTTGTTCATTG – 3') targets  
438 the positive-sense envelope protein (E) gene (73) and contains the 5' 25-nucleotide  
439 ISPCR universal anchor sequence (underlined) from the Smart-seq2 protocol published  
440 by Picelli and colleagues (45) for downstream amplification alongside 3' SMART-Seq  
441 CDS Primer II A-primed transcripts. Similar to 3' SMART-Seq CDS Primer II A, 1 µL of  
442 WNV SC primer (12 µM) was added to the RT reaction for all samples. Other WNV-  
443 specific primer sequences and concentrations were evaluated. The scRNA-seq protocol  
444 was optimized to ensure high sensitivity for WNV RNA detection and to mitigate the  
445 formation of primer dimers or template-switching oligo (TSO) concatemers observed at  
446 high concentrations or with other primer sequences. During template switching, the RT  
447 product is extended with a sequence complementary to the TSO due to the addition of  
448 2-5 untemplated nucleotides and the capacity of the RT enzyme to switch templates just  
449 as described in Smart-seq2 (45). PCR is performed using PCR Primer II A (the ISPCR

450 universal anchor sequence) for concurrent amplification of both host and viral cDNA.  
451 Following PCR amplification, cDNA quantification is performed for each sample, and  
452 cDNA quality assessment is accomplished using an Agilent 2100 Bioanalyzer. For  
453 library preparation, amplified cDNA is fragmented and appended with dual-indexed  
454 barcodes using Illumina Nextera XT DNA Library Prep kits. Sequencing was performed  
455 using 101-bp single end reads at Yerkes Genomics Core  
456 ([http://www.yerkes.emory.edu/nhp\\_genomics\\_core/](http://www.yerkes.emory.edu/nhp_genomics_core/)) as previously described (75) on an  
457 Illumina HiSeq 3000 at a depth of ~1,000,000 reads per cell. In total, 127 cells were  
458 successfully captured and profiled for single-cell transcriptomic analysis: 25 Mock cells,  
459 68 WNV cells, and 34 WNV (+Ab) cells.

460

461 **Bioinformatics pipeline.** Libraries were sequenced on an Illumina HiSeq 3000  
462 generating 101-bp single end reads. FastQC (76) was used to check the quality of fastq  
463 files. The primary assembly of GENCODE mouse reference genome (GRCm38.p5  
464 Release M16) (77) and the complete genome of WNV isolate Texas 2002-HC  
465 (GenBank accession number: DQ176637.1) from ViPR (78) were used for mapping  
466 reads. The genome index was built by combining both the genomes, and alignments  
467 were carried out for the combined genomes. STAR v2.5.2b (79) was used with default  
468 parameters to map reads and obtain reads per gene counts (`-quantMode Gene`  
469 `Counts`). The counts obtained with STAR were used for downstream analysis in R. The  
470 counts were used to create a `SingleCellExperiment v1.0.0` (80) object. The `scater v1.6.3`  
471 (81) library was used for quality control of cells. Genes that were not expressed in any  
472 cell were filtered out. The `isOutlier` function from `scrn` was used to remove cells that

473 had a library size and number of detected genes greater than 3 median absolute  
474 deviations lower than the median values or those with percentage of mitochondrial  
475 genes that were 3 median absolute deviations higher than the median value (82). The  
476 cell cycle phase was predicted using the cyclone function in scran package v1.6.3 (80,  
477 82). The normalized expression values were obtained using the calculateCPM function  
478 in the scater library.

479

480 **Statistical analysis and software.** Prism 6 (GraphPad), ggplot2 R package, ggridges  
481 R package, corrplot R package and Hmisc R package were used for statistical analyses  
482 and graphical presentation of data. Spearman's rank correlation coefficients ( $\rho$ ) and  
483 associated  $p$  values were computed for each gene pairing using the rcorr function in  
484 Hmisc R package. Two-way ANOVA with Tukey's multiple comparison correction was  
485 used to evaluate significant differences between conditions for percentage of WNV E-  
486 positive cells and relative viral RNA. Wilcoxon rank-sum test with continuity correction  
487 was performed to assess significant differences between single-cell distributions for  
488 host mRNA and viral RNA counts per million transcripts (CPM).

489

490

491

492 **FIGURE LEGENDS**

493 **Figure 1. Population-level analysis of WNV infection in L929 cells.**

494 (A) L929 cells were infected with WNV at a MOI of 0.1, 1, or 10 and incubated for 6, 12,  
495 24, or 48 hr (n = 3). (A-B) Intracellular viral E protein staining was performed by flow  
496 cytometry using WNV E16 antibody. (B-C) L929 cells were inoculated with UV-  
497 inactivated WNV (UV) or WNV at a MOI of 1 and incubated for 12 or 24 hr in the  
498 presence (+Ab) or absence of WNV E16 neutralizing antibody (5 µg/mL) to reduce *in*  
499 *vitro* spread (n = 3). (C) Viral RNA quantification was measured by qPCR, and C<sub>T</sub>  
500 values were normalized to the reference gene *Gapdh* and represented as fold change  
501 over time-matched mock values. (A-C) Two-way ANOVA with multiple comparison  
502 correction was used to test for significance (\**p* < 0.05). (D-F) Cells were infected as in  
503 (B) and examined by bulk RNA-seq analysis at 24 hr post-infection (n = 3). (D-E) Heat  
504 map showing mean gene expression values normalized and represented as fold change  
505 over time-matched mock values. Expression fold change values correspond to the color  
506 gradient (bottom). (D) Gene cluster description can be found on the left. (E) Expression  
507 fold change displayed for a panel of select genes. (F) Scatter plot for comparison of up-  
508 regulated and down-regulated genes in WNV and WNV (+Ab) conditions. Cut-off values  
509 were as follows: 1.5 fold change and *p* < 0.01.

510

511 **Figure 2. WNV-inclusive single-cell RNA sequencing.**

512 (A) L929 cells were infected with WNV (MOI of 1) and incubated in the presence of the  
513 WNV E16 neutralizing Ab (5 µg/mL) to limit *in vitro* spread. (B) Single cells were sorted  
514 into 96-well PCR plates containing 10 µL lysis buffer per well. (C) During reverse



515 transcription (RT), 3' SMART-Seq CDS Primer II A (30-nucleotide poly-dT sequence  
516 with a 5' 25-nucleotide ISPCR universal anchor sequence) and a WNV-specific viral  
517 primer (21-nucleotide sequence complementary to positive-strand viral RNA with a 5'  
518 25-nucleotide ISPCR universal anchor sequence) are added to capture host transcripts  
519 and viral RNA, respectively. When the reverse transcriptase reaches the 5' end of both  
520 host mRNA and viral RNA, its terminal transferase activity adds 2-5 untemplated  
521 nucleotides that serve as an anchor for the template-switching oligo (TSO), which  
522 allows extension of the RT product with sequence complementary to the universal  
523 anchor sequence. PCR Primer II A binds this sequence for concurrent amplification of  
524 both host and viral cDNA. In the final library preparation step, transposase 5 (Tn5)-  
525 based Nextera tagmentation adds sequencing indexes. Illumina sequencing is  
526 performed using 101-bp single end reads, thereby quantifying host mRNA and viral  
527 RNA from single cells. (B-C) In total, 127 cells were successfully captured and profiled:  
528 25 Mock cells, 68 WNV cells, and 34 WNV (+Ab) cells. (D) Coverage and alignment of  
529 WNV reads are shown with reference to the WNV genome and WNV SC primer (viral  
530 primer) location, and y-axes are in log<sub>10</sub> scale. The cells representing the median value  
531 for WNV and Mock conditions are shown. Violin plot showing expression as counts per  
532 million transcripts (CPM) in log<sub>2</sub> scale for WNV RNA in all three conditions described in  
533 2A. Wilcoxon rank-sum test with continuity correction was performed to test significance  
534 (\*\* $p < 10^{-9}$ ). (E) Violin plots showing expression as CPM in log<sub>2</sub> scale for housekeeping  
535 genes. Wilcoxon rank-sum test with continuity correction was performed to test  
536 significance (ns = not significant; \* $p < 10^{-3}$ ; \*\* $p < 10^{-6}$ ).

537

538 **Figure 3. Cellular heterogeneity in IFN-stimulated gene induction following WNV**  
539 **infection.**

540 Violin plots showing single-cell distributions for host gene expression as counts per  
541 million transcripts (CPM) in log<sub>2</sub> scale. Genes are grouped by categories: (A) IFN-I  
542 production and other cytokines; and (B) PRR and IFN-I signaling. Conditions are  
543 described in Fig. 2A. Wilcoxon rank-sum test with continuity correction was performed  
544 to test significance (ns = not significant; \* $p < 10^{-3}$ ; \*\* $p < 10^{-6}$ ).

545

546 **Figure 4. Unimodal and bimodal variation in antiviral effector gene expression at**  
547 **single-cell following WNV infection.**

548 Violin plots showing single-cell distributions for antiviral effector gene expression as  
549 counts per million transcripts (CPM) in log<sub>2</sub> scale. Conditions are described in Fig. 2A.  
550 Wilcoxon rank-sum test with continuity correction was performed to test significance (ns  
551 = not significant; \* $p < 10^{-3}$ ; \*\* $p < 10^{-6}$ ).

552

553 **Figure 5. ISGs negatively correlate with WNV RNA abundance.**

554 (A) Gene ontology (GO) enrichment analysis for genes significantly ( $p < 0.001$ )  
555 positively correlated ( $\rho > 0.35$ ) and negatively correlated ( $\rho < -0.35$ ) with viral RNA.  
556 Enrichment scores (ES) calculated for each pathway by the formula:  $-\log_{10}(p \text{ value})$ .  
557 Dotted line indicates significance cutoff ( $p = 0.05$ ; ES = 1.3). (B) Density plots of host  
558 gene expression correlated viral RNA across all WNV cells. Spearman's correlation  
559 coefficients ( $\rho$ ) calculated for each host gene by viral RNA. Gene set labels (left) and  
560 totals (right) are shown. Cell cycle-associated genes are additionally subdivided by

561 phase. Select genes were marked and labeled. Dotted lines indicate correlation  
562 coefficients ( $\rho$ ) equal to -0.35 and 0.35. (C) Correlation matrix for 57 of 124 negatively  
563 correlated ISGs, all positively correlated ISGs, 9 non-correlated cytokine genes and  
564 WNV RNA. Correlation coefficients ( $\rho$ ) calculated for each gene pairing are indicated by  
565 the color gradient (bottom). White boxes represent comparisons for which the  
566 correlation did not meet the significance cutoff ( $p < 0.001$ ).

567

568 **Figure 6. Sharp downward trend for ISGs negatively correlated with viral RNA.**

569 Scatter plots showing expression as counts per million transcripts (CPM) in log2 scale  
570 of positively and negatively correlated host genes by WNV RNA. Each cell is  
571 represented by a single dot with minimal transparency so areas of high density are  
572 easily discernable. Correlation coefficients ( $\rho$ ) are indicated for each gene and  
573 correspond to the color gradient (top). Scatter plots have been collated from lowest to  
574 highest correlation coefficient. All genes shown here meet the following criteria:  $|\rho| > 0.4$   
575 and  $p < 0.0005$ .

576

577

578 **Acknowledgments**

579 We thank the Emory Vaccine Center Flow Core, specifically Kiran Gill and Barbara  
580 Cervasi, for assistance with cell sorting and the Yerkes Genomics Core for library  
581 preparation and sequencing.

582

583

584 **Funding Information**

585 This work was funded in part by National Institutes of Health grants U19AI083019  
586 (M.S.S), (M.S.S), 5U19AI106772 (M.S.S), R21AI113485 (M.S.S.), ORIP/OD  
587 P51OD011132 (M.S.S), Emory University Department of Pediatrics Junior Faculty  
588 Focused Award (M.S.S), Children's Healthcare of Atlanta, Emory Vaccine Center, and  
589 The Georgia Research Alliance (M.S.S). The funders had no role in study design, data  
590 collection and analysis, decision to publish, or preparation of the manuscript.

591

592

593 **BIBLIOGRAPHY**

- 594 1. Chancey C, Grinev A, Volkova E, Rios M. 2015. The global ecology and  
595 epidemiology of West Nile virus. *Biomed Res Int* 2015:376230.
- 596 2. Krow-Lucal E, Lindsey NP, Lehman J, Fischer M, Staples JE. 2017. West Nile  
597 Virus and Other Nationally Notifiable Arboviral Diseases - United States, 2015.  
598 *MMWR Morb Mortal Wkly Rep* 66:51-55.
- 599 3. Suthar MS, Diamond MS, Gale M, Jr. 2013. West Nile virus infection and  
600 immunity. *Nat Rev Microbiol* 11:115-28.
- 601 4. Swanson PA, 2nd, McGavern DB. 2015. Viral diseases of the central nervous  
602 system. *Curr Opin Virol* 11:44-54.
- 603 5. Brien JD, Uhrlaub JL, Nikolich-Zugich J. 2008. West Nile virus-specific CD4 T  
604 cells exhibit direct antiviral cytokine secretion and cytotoxicity and are sufficient  
605 for antiviral protection. *J Immunol* 181:8568-75.
- 606 6. Durrant DM, Robinette ML, Klein RS. 2013. IL-1R1 is required for dendritic cell-  
607 mediated T cell reactivation within the CNS during West Nile virus encephalitis. *J*  
608 *Exp Med* 210:503-16.
- 609 7. Gorman MJ, Caine EA, Zaitsev K, Begley MC, Weger-Lucarelli J, Uccellini MB,  
610 Tripathi S, Morrison J, Yount BL, Dinnon KH, 3rd, Ruckert C, Young MC, Zhu Z,  
611 Robertson SJ, McNally KL, Ye J, Cao B, Mysorekar IU, Ebel GD, Baric RS, Best  
612 SM, Artyomov MN, Garcia-Sastre A, Diamond MS. 2018. An Immunocompetent  
613 Mouse Model of Zika Virus Infection. *Cell Host Microbe* 23:672-685 e6.
- 614 8. Klein RS, Lin E, Zhang B, Luster AD, Tollett J, Samuel MA, Engle M, Diamond  
615 MS. 2005. Neuronal CXCL10 directs CD8+ T-cell recruitment and control of West  
616 Nile virus encephalitis. *J Virol* 79:11457-66.

- 617 9. Lazear HM, Lancaster A, Wilkins C, Suthar MS, Huang A, Vick SC, Clepper L,  
618 Thackray L, Brassil MM, Virgin HW, Nikolich-Zugich J, Moses AV, Gale M, Jr.,  
619 Fruh K, Diamond MS. 2013. IRF-3, IRF-5, and IRF-7 coordinately regulate the  
620 type I IFN response in myeloid dendritic cells downstream of MAVS signaling.  
621 PLoS Pathog 9:e1003118.
- 622 10. Lubick KJ, Robertson SJ, McNally KL, Freedman BA, Rasmussen AL, Taylor RT,  
623 Walts AD, Tsuruda S, Sakai M, Ishizuka M, Boer EF, Foster EC, Chiramel AI,  
624 Addison CB, Green R, Kastner DL, Katze MG, Holland SM, Forlino A, Freeman  
625 AF, Boehm M, Yoshii K, Best SM. 2015. Flavivirus Antagonism of Type I  
626 Interferon Signaling Reveals Prolidase as a Regulator of IFNAR1 Surface  
627 Expression. Cell Host Microbe 18:61-74.
- 628 11. Pinto AK, Ramos HJ, Wu X, Aggarwal S, Shrestha B, Gorman M, Kim KY, Suthar  
629 MS, Atkinson JP, Gale M, Jr., Diamond MS. 2014. Deficient IFN signaling by  
630 myeloid cells leads to MAVS-dependent virus-induced sepsis. PLoS Pathog  
631 10:e1004086.
- 632 12. Schneider WM, Chevillotte MD, Rice CM. 2014. Interferon-stimulated genes: a  
633 complex web of host defenses. Annu Rev Immunol 32:513-45.
- 634 13. Sen A, Rothenberg ME, Mukherjee G, Feng N, Kalisky T, Nair N, Johnstone IM,  
635 Clarke MF, Greenberg HB. 2012. Innate immune response to homologous  
636 rotavirus infection in the small intestinal villous epithelium at single-cell resolution.  
637 Proc Natl Acad Sci U S A 109:20667-72.
- 638 14. Suthar MS, Ma DY, Thomas S, Lund JM, Zhang N, Daffis S, Rudensky AY,  
639 Bevan MJ, Clark EA, Kaja MK, Diamond MS, Gale M, Jr. 2010. IPS-1 is essential

- 640 for the control of West Nile virus infection and immunity. *PLoS Pathog*  
641 6:e1000757.
- 642 15. Samuel MA, Diamond MS. 2005. Alpha/beta interferon protects against lethal  
643 West Nile virus infection by restricting cellular tropism and enhancing neuronal  
644 survival. *J Virol* 79:13350-61.
- 645 16. Hu J, Nudelman G, Shimoni Y, Kumar M, Ding Y, Lopez C, Hayot F, Wetmur JG,  
646 Sealton SC. 2011. Role of cell-to-cell variability in activating a positive feedback  
647 antiviral response in human dendritic cells. *PLoS One* 6:e16614.
- 648 17. Patil S, Fribourg M, Ge Y, Batish M, Tyagi S, Hayot F, Sealton SC. 2015. Single-  
649 cell analysis shows that paracrine signaling by first responder cells shapes the  
650 interferon-beta response to viral infection. *Sci Signal* 8:ra16.
- 651 18. Rand U, Rinas M, Schwerk J, Nohren G, Linnes M, Kroger A, Flossdorf M, Kaly-  
652 Kullai K, Hauser H, Hofer T, Koster M. 2012. Multi-layered stochasticity and  
653 paracrine signal propagation shape the type-I interferon response. *Mol Syst Biol*  
654 8:584.
- 655 19. Zhao M, Zhang J, Phatnani H, Scheu S, Maniatis T. 2012. Stochastic expression  
656 of the interferon-beta gene. *PLoS Biol* 10:e1001249.
- 657 20. Sadler AJ, Williams BR. 2008. Interferon-inducible antiviral effectors. *Nat Rev*  
658 *Immunol* 8:559-68.
- 659 21. Schoggins JW. 2014. Interferon-stimulated genes: roles in viral pathogenesis.  
660 *Curr Opin Virol* 6:40-6.



- 661 22. Honda K, Takaoka A, Taniguchi T. 2006. Type I interferon [corrected] gene  
662 induction by the interferon regulatory factor family of transcription factors.  
663 *Immunity* 25:349-60.
- 664 23. Ashour J, Laurent-Rolle M, Shi PY, Garcia-Sastre A. 2009. NS5 of dengue virus  
665 mediates STAT2 binding and degradation. *J Virol* 83:5408-18.
- 666 24. Grant A, Ponia SS, Tripathi S, Balasubramaniam V, Miorin L, Sourisseau M,  
667 Schwarz MC, Sanchez-Seco MP, Evans MJ, Best SM, Garcia-Sastre A. 2016.  
668 Zika Virus Targets Human STAT2 to Inhibit Type I Interferon Signaling. *Cell Host*  
669 *Microbe* 19:882-90.
- 670 25. Morrison J, Laurent-Rolle M, Maestre AM, Rajsbaum R, Pisanelli G, Simon V,  
671 Mulder LC, Fernandez-Sesma A, Garcia-Sastre A. 2013. Dengue virus co-opts  
672 UBR4 to degrade STAT2 and antagonize type I interferon signaling. *PLoS*  
673 *Pathog* 9:e1003265.
- 674 26. Schoggins JW, Wilson SJ, Panis M, Murphy MY, Jones CT, Bieniasz P, Rice CM.  
675 2011. A diverse range of gene products are effectors of the type I interferon  
676 antiviral response. *Nature* 472:481-5.
- 677 27. Shalek AK, Satija R, Shuga J, Trombetta JJ, Gennert D, Lu D, Chen P, Gertner  
678 RS, Gaublomme JT, Yosef N, Schwartz S, Fowler B, Weaver S, Wang J, Wang  
679 X, Ding R, Raychowdhury R, Friedman N, Hacohen N, Park H, May AP, Regev A.  
680 2014. Single-cell RNA-seq reveals dynamic paracrine control of cellular variation.  
681 *Nature* 510:363-9.
- 682 28. Daffis S, Szretter KJ, Schriewer J, Li J, Youn S, Errett J, Lin TY, Schneller S,  
683 Zust R, Dong H, Thiel V, Sen GC, Fensterl V, Klimstra WB, Pierson TC, Buller

- 684 RM, Gale M, Jr., Shi PY, Diamond MS. 2010. 2'-O methylation of the viral mRNA  
685 cap evades host restriction by IFIT family members. *Nature* 468:452-6.
- 686 29. Russell AB, Trapnell C, Bloom JD. 2018. Extreme heterogeneity of influenza  
687 virus infection in single cells. *Elife* 7.
- 688 30. Schulte MB, Andino R. 2014. Single-cell analysis uncovers extensive biological  
689 noise in poliovirus replication. *J Virol* 88:6205-12.
- 690 31. Zanini F, Pu SY, Bekerman E, Einav S, Quake SR. 2018. Single-cell  
691 transcriptional dynamics of flavivirus infection. *Elife* 7.
- 692 32. Hamlin RE, Rahman A, Pak TR, Maringer K, Mena I, Bernal-Rubio D, Potla U,  
693 Maestre AM, Fredericks AC, Amir ED, Kasarskis A, Ramos I, Merad M,  
694 Fernandez-Sesma A. 2017. High-dimensional CyTOF analysis of dengue virus-  
695 infected human DCs reveals distinct viral signatures. *JCI Insight* 2.
- 696 33. Avraham R, Haseley N, Brown D, Penaranda C, Jijon HB, Trombetta JJ, Satija R,  
697 Shalek AK, Xavier RJ, Regev A, Hung DT. 2015. Pathogen Cell-to-Cell Variability  
698 Drives Heterogeneity in Host Immune Responses. *Cell* 162:1309-21.
- 699 34. Alvarez-Errico D, Vento-Tormo R, Sieweke M, Ballestar E. 2015. Epigenetic  
700 control of myeloid cell differentiation, identity and function. *Nat Rev Immunol*  
701 15:7-17.
- 702 35. Ford E, Thanos D. 2010. The transcriptional code of human IFN-beta gene  
703 expression. *Biochim Biophys Acta* 1799:328-36.
- 704 36. Xue S, Liu C, Sun X, Li W, Zhang C, Zhou X, Lu Y, Xiao J, Li C, Xu X, Sun B, Xu  
705 G, Wang H. 2016. TET3 Inhibits Type I IFN Production Independent of DNA  
706 Demethylation. *Cell Rep* 16:1096-1105.

- 707 37. Kwon YJ, Heo J, Wong HE, Cruz DJ, Velumani S, da Silva CT, Mosimann AL,  
708 Duarte Dos Santos CN, Freitas-Junior LH, Fink K. 2014. Kinome siRNA screen  
709 identifies novel cell-type specific dengue host target genes. *Antiviral Res* 110:20-  
710 30.
- 711 38. Marceau CD, Puschnik AS, Majzoub K, Ooi YS, Brewer SM, Fuchs G,  
712 Swaminathan K, Mata MA, Elias JE, Sarnow P, Carette JE. 2016. Genetic  
713 dissection of Flaviviridae host factors through genome-scale CRISPR screens.  
714 *Nature* 535:159-63.
- 715 39. Zhang R, Miner JJ, Gorman MJ, Rausch K, Ramage H, White JP, Zuiani A,  
716 Zhang P, Fernandez E, Zhang Q, Dowd KA, Pierson TC, Cherry S, Diamond MS.  
717 2016. A CRISPR screen defines a signal peptide processing pathway required by  
718 flaviviruses. *Nature* 535:164-8.
- 719 40. Krishnan MN, Ng A, Sukumaran B, Gilfoy FD, Uchil PD, Sultana H, Brass AL,  
720 Adametz R, Tsui M, Qian F, Montgomery RR, Lev S, Mason PW, Koski RA,  
721 Elledge SJ, Xavier RJ, Agaisse H, Fikrig E. 2008. RNA interference screen for  
722 human genes associated with West Nile virus infection. *Nature* 455:242-5.
- 723 41. Ma H, Dang Y, Wu Y, Jia G, Anaya E, Zhang J, Abraham S, Choi JG, Shi G, Qi L,  
724 Manjunath N, Wu H. 2015. A CRISPR-Based Screen Identifies Genes Essential  
725 for West-Nile-Virus-Induced Cell Death. *Cell Rep* 12:673-83.
- 726 42. Li J, Ding SC, Cho H, Chung BC, Gale M, Jr., Chanda SK, Diamond MS. 2013. A  
727 short hairpin RNA screen of interferon-stimulated genes identifies a novel  
728 negative regulator of the cellular antiviral response. *MBio* 4:e00385-13.

- 729 43. Hoss-Homfeld A, Zwarthoff EC, Zawatzky R. 1989. Cell type specific expression  
730 and regulation of murine interferon alpha and beta genes. *Virology* 173:539-50.
- 731 44. Nybakken GE, Oliphant T, Johnson S, Burke S, Diamond MS, Fremont DH. 2005.  
732 Structural basis of West Nile virus neutralization by a therapeutic antibody.  
733 *Nature* 437:764-9.
- 734 45. Picelli S, Faridani OR, Bjorklund AK, Winberg G, Sagasser S, Sandberg R. 2014.  
735 Full-length RNA-seq from single cells using Smart-seq2. *Nat Protoc* 9:171-81.
- 736 46. Wu AR, Neff NF, Kalisky T, Dalerba P, Treutlein B, Rothenberg ME, Mburu FM,  
737 Mantalas GL, Sim S, Clarke MF, Quake SR. 2014. Quantitative assessment of  
738 single-cell RNA-sequencing methods. *Nat Methods* 11:41-6.
- 739 47. Marie I, Durbin JE, Levy DE. 1998. Differential viral induction of distinct  
740 interferon-alpha genes by positive feedback through interferon regulatory factor-7.  
741 *EMBO J* 17:6660-9.
- 742 48. Sato M, Hata N, Asagiri M, Nakaya T, Taniguchi T, Tanaka N. 1998. Positive  
743 feedback regulation of type I IFN genes by the IFN-inducible transcription factor  
744 IRF-7. *FEBS Lett* 441:106-10.
- 745 49. Sato M, Suemori H, Hata N, Asagiri M, Ogasawara K, Nakao K, Nakaya T,  
746 Katsuki M, Noguchi S, Tanaka N, Taniguchi T. 2000. Distinct and essential roles  
747 of transcription factors IRF-3 and IRF-7 in response to viruses for IFN-alpha/beta  
748 gene induction. *Immunity* 13:539-48.
- 749 50. Brass AL, Huang IC, Benita Y, John SP, Krishnan MN, Feeley EM, Ryan BJ,  
750 Weyer JL, van der Weyden L, Fikrig E, Adams DJ, Xavier RJ, Farzan M, Elledge

- 751 SJ. 2009. The IFITM proteins mediate cellular resistance to influenza A H1N1  
752 virus, West Nile virus, and dengue virus. *Cell* 139:1243-54.
- 753 51. Gorman MJ, Poddar S, Farzan M, Diamond MS. 2016. The Interferon-Stimulated  
754 Gene Ifitm3 Restricts West Nile Virus Infection and Pathogenesis. *J Virol*  
755 90:8212-25.
- 756 52. Kajaste-Rudnitski A, Mashimo T, Frenkiel MP, Guenet JL, Lucas M, Despres P.  
757 2006. The 2',5'-oligoadenylate synthetase 1b is a potent inhibitor of West Nile  
758 virus replication inside infected cells. *J Biol Chem* 281:4624-37.
- 759 53. Liu XY, Chen W, Wei B, Shan YF, Wang C. 2011. IFN-induced TPR protein IFIT3  
760 potentiates antiviral signaling by bridging MAVS and TBK1. *J Immunol* 187:2559-  
761 68.
- 762 54. Perelygin AA, Scherbik SV, Zhulin IB, Stockman BM, Li Y, Brinton MA. 2002.  
763 Positional cloning of the murine flavivirus resistance gene. *Proc Natl Acad Sci U*  
764 *S A* 99:9322-7.
- 765 55. Szretter KJ, Brien JD, Thackray LB, Virgin HW, Cresswell P, Diamond MS. 2011.  
766 The interferon-inducible gene viperin restricts West Nile virus pathogenesis. *J*  
767 *Virol* 85:11557-66.
- 768 56. Verhelst J, Parthoens E, Schepens B, Fiers W, Saelens X. 2012. Interferon-  
769 inducible protein Mx1 inhibits influenza virus by interfering with functional viral  
770 ribonucleoprotein complex assembly. *J Virol* 86:13445-55.
- 771 57. Shrestha B, Pinto AK, Green S, Bosch I, Diamond MS. 2012. CD8+ T cells use  
772 TRAIL to restrict West Nile virus pathogenesis by controlling infection in neurons.  
773 *J Virol* 86:8937-48.

- 774 58. Li Y, Banerjee S, Wang Y, Goldstein SA, Dong B, Gaughan C, Silverman RH,  
775 Weiss SR. 2016. Activation of RNase L is dependent on OAS3 expression during  
776 infection with diverse human viruses. *Proc Natl Acad Sci U S A* 113:2241-6.
- 777 59. Huang da W, Sherman BT, Lempicki RA. 2009. Systematic and integrative  
778 analysis of large gene lists using DAVID bioinformatics resources. *Nat Protoc*  
779 4:44-57.
- 780 60. Huang da W, Sherman BT, Lempicki RA. 2009. Bioinformatics enrichment tools:  
781 paths toward the comprehensive functional analysis of large gene lists. *Nucleic*  
782 *Acids Res* 37:1-13.
- 783 61. Macosko EZ, Basu A, Satija R, Nemesh J, Shekhar K, Goldman M, Tirosh I,  
784 Bialas AR, Kamitaki N, Martersteck EM, Trombetta JJ, Weitz DA, Sanes JR,  
785 Shalek AK, Regev A, McCarroll SA. 2015. Highly Parallel Genome-wide  
786 Expression Profiling of Individual Cells Using Nanoliter Droplets. *Cell* 161:1202-  
787 1214.
- 788 62. Baranek T, Manh TP, Alexandre Y, Maqbool MA, Cabeza JZ, Tomasello E,  
789 Crozat K, Bessou G, Zucchini N, Robbins SH, Vivier E, Kalinke U, Ferrier P,  
790 Dalod M. 2012. Differential responses of immune cells to type I interferon  
791 contribute to host resistance to viral infection. *Cell Host Microbe* 12:571-84.
- 792 63. Illumina Inc. 2017. Effects of Index Misassignment on Multiplexing and  
793 Downstream Analysis.
- 794 64. Best SM. 2017. The Many Faces of the Flavivirus NS5 Protein in Antagonism of  
795 Type I Interferon Signaling. *J Virol* 91.

- 796 65. Bowen JR, Zimmerman MG, Suthar MS. 2017. Taking the defensive: Immune  
797 control of Zika virus infection. *Virus Res* doi:10.1016/j.virusres.2017.08.018.
- 798 66. Quicke KM, Diamond MS, Suthar MS. 2017. Negative regulators of the RIG-I-like  
799 receptor signaling pathway. *Eur J Immunol* 47:615-628.
- 800 67. Quicke KM, Suthar MS. 2013. The innate immune playbook for restricting West  
801 Nile virus infection. *Viruses* 5:2643-58.
- 802 68. Bowen JR, Quicke KM, Maddur MS, O'Neal JT, McDonald CE, Fedorova NB,  
803 Puri V, Shabman RS, Pulendran B, Suthar MS. 2017. Zika Virus Antagonizes  
804 Type I Interferon Responses during Infection of Human Dendritic Cells. *PLoS*  
805 *Pathog* 13:e1006164.
- 806 69. Ambrose RL, Mackenzie JM. 2011. West Nile virus differentially modulates the  
807 unfolded protein response to facilitate replication and immune evasion. *J Virol*  
808 85:2723-32.
- 809 70. Mackenzie JM, Khromykh AA, Parton RG. 2007. Cholesterol manipulation by  
810 West Nile virus perturbs the cellular immune response. *Cell Host Microbe* 2:229-  
811 39.
- 812 71. Roosendaal J, Westaway EG, Khromykh A, Mackenzie JM. 2006. Regulated  
813 cleavages at the West Nile virus NS4A-2K-NS4B junctions play a major role in  
814 rearranging cytoplasmic membranes and Golgi trafficking of the NS4A protein. *J*  
815 *Virol* 80:4623-32.
- 816 72. Aguilar-Valenzuela R, Netland J, Seo YJ, Bevan MJ, Grakoui A, Suthar MS.  
817 2018. Dynamics of Tissue-Specific CD8(+) T Cell Responses during West Nile  
818 Virus Infection. *J Virol* 92.

- 819 73. Lanciotti RS, Kerst AJ, Nasci RS, Godsey MS, Mitchell CJ, Savage HM, Komar N,  
820 Panella NA, Allen BC, Volpe KE, Davis BS, Roehrig JT. 2000. Rapid detection of  
821 west nile virus from human clinical specimens, field-collected mosquitoes, and  
822 avian samples by a TaqMan reverse transcriptase-PCR assay. *J Clin Microbiol*  
823 38:4066-71.
- 824 74. Love MI, Huber W, Anders S. 2014. Moderated estimation of fold change and  
825 dispersion for RNA-seq data with DESeq2. *Genome Biol* 15:550.
- 826 75. Upadhyay AA, Kauffman RC, Wolabaugh AN, Cho A, Patel NB, Reiss SM,  
827 Havenar-Daughton C, Dawoud RA, Tharp GK, Sanz I, Pulendran B, Crotty S,  
828 Lee FE, Wrammert J, Bosinger SE. 2018. BALDR: a computational pipeline for  
829 paired heavy and light chain immunoglobulin reconstruction in single-cell RNA-  
830 seq data. *Genome Med* 10:20.
- 831 76. Andrews S. 2010. FastQC: a quality control tool for high throughput sequence  
832 data,
- 833 77. Harrow J, Frankish A, Gonzalez JM, Tapanari E, Diekhans M, Kokocinski F,  
834 Aken BL, Barrell D, Zadissa A, Searle S, Barnes I, Bignell A, Boychenko V, Hunt  
835 T, Kay M, Mukherjee G, Rajan J, Despacio-Reyes G, Saunders G, Steward C,  
836 Harte R, Lin M, Howald C, Tanzer A, Derrien T, Chrast J, Walters N,  
837 Balasubramanian S, Pei B, Tress M, Rodriguez JM, Ezkurdia I, van Baren J,  
838 Brent M, Haussler D, Kellis M, Valencia A, Reymond A, Gerstein M, Guigo R,  
839 Hubbard TJ. 2012. GENCODE: the reference human genome annotation for The  
840 ENCODE Project. *Genome Res* 22:1760-74.



- 841 78. Pickett BE, Sadat EL, Zhang Y, Noronha JM, Squires RB, Hunt V, Liu M, Kumar  
842 S, Zaremba S, Gu Z, Zhou L, Larson CN, Dietrich J, Klem EB, Scheuermann RH.  
843 2012. ViPR: an open bioinformatics database and analysis resource for virology  
844 research. *Nucleic Acids Res* 40:D593-8.
- 845 79. Dobin A, Davis CA, Schlesinger F, Drenkow J, Zaleski C, Jha S, Batut P,  
846 Chaisson M, Gingeras TR. 2013. STAR: ultrafast universal RNA-seq aligner.  
847 *Bioinformatics* 29:15-21.
- 848 80. Lun AR, D. 2018. Single Cell Experiment: S4 Classes for Single Cell Data,  
849 Bioconductor.
- 850 81. McCarthy DJ, Campbell KR, Lun AT, Wills QF. 2017. Scater: pre-processing,  
851 quality control, normalization and visualization of single-cell RNA-seq data in R.  
852 *Bioinformatics* 33:1179-1186.
- 853 82. Scialdone A, Natarajan KN, Saraiva LR, Proserpio V, Teichmann SA, Stegle O,  
854 Marioni JC, Buettner F. 2015. Computational assignment of cell-cycle stage from  
855 single-cell transcriptome data. *Methods* 85:54-61.
- 856

Figure 1

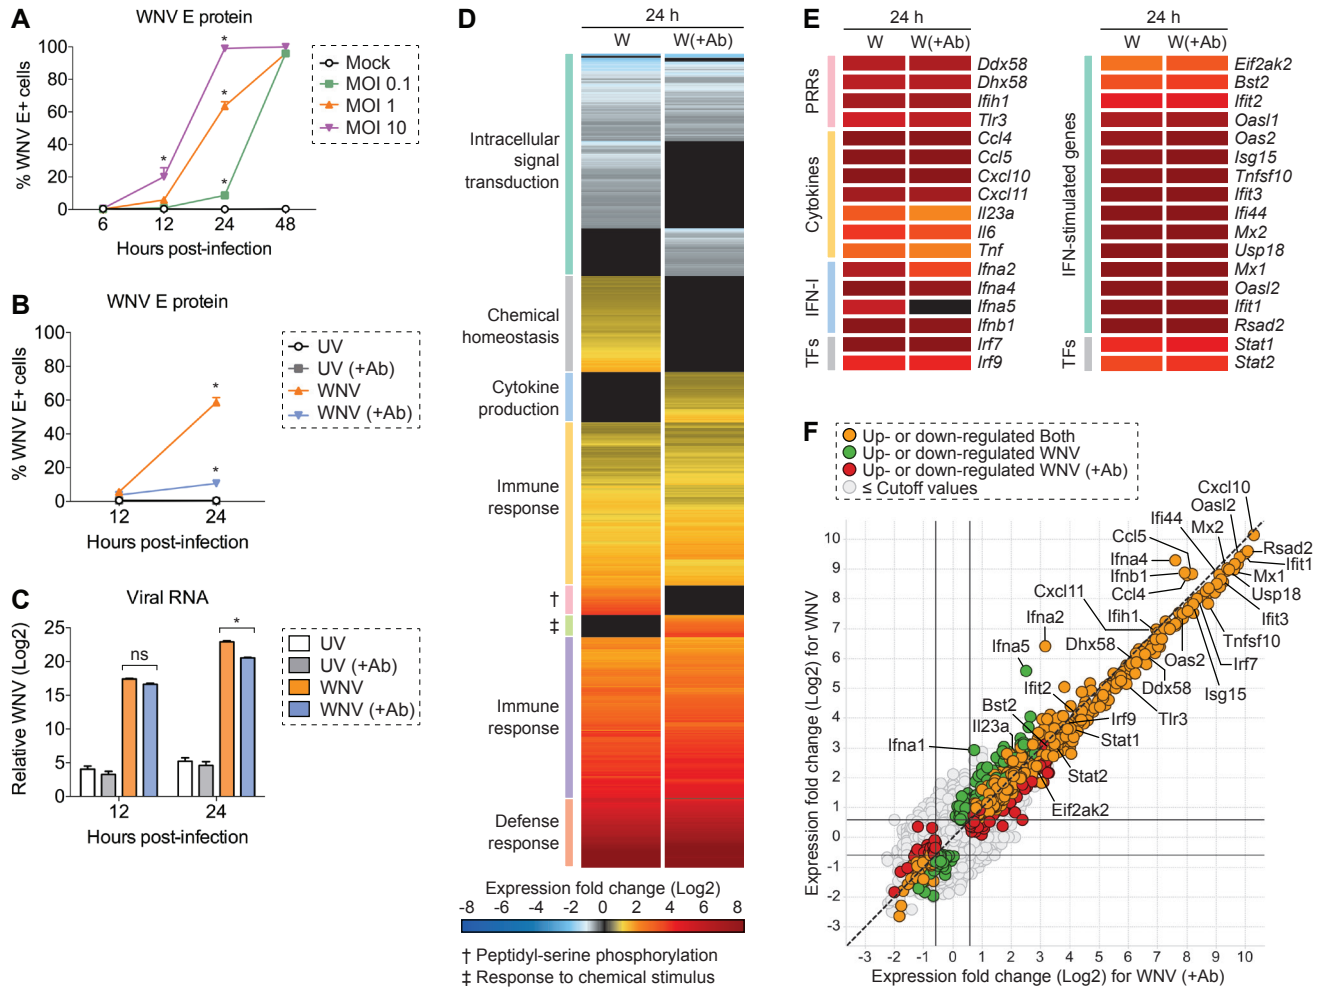

Figure 2

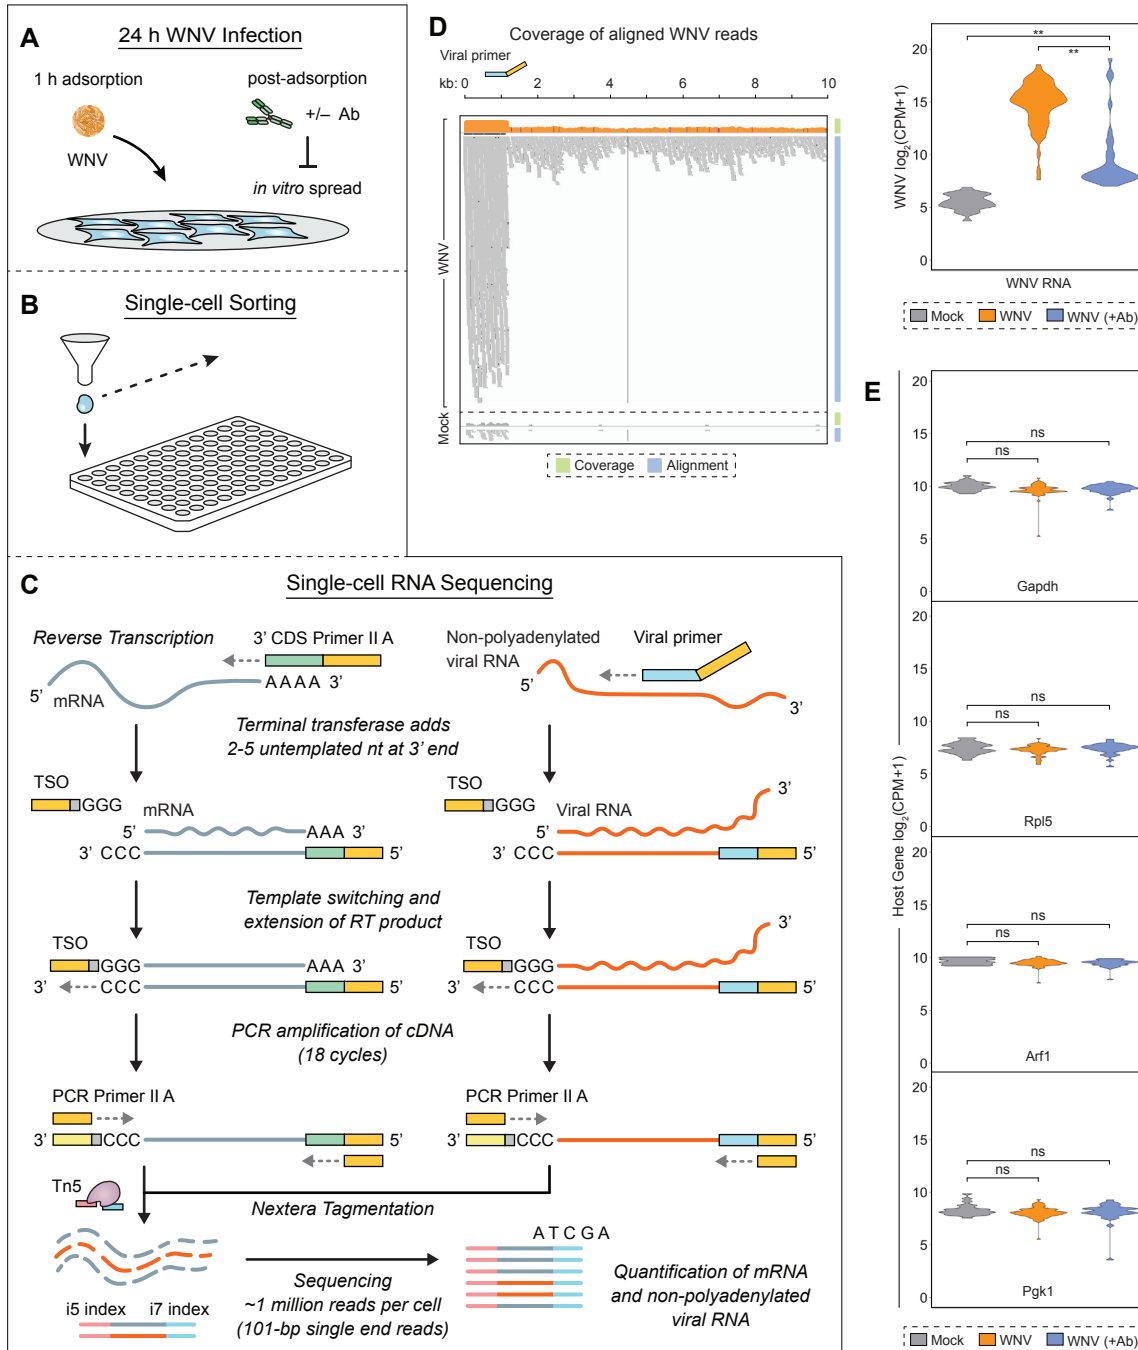

Figure 3

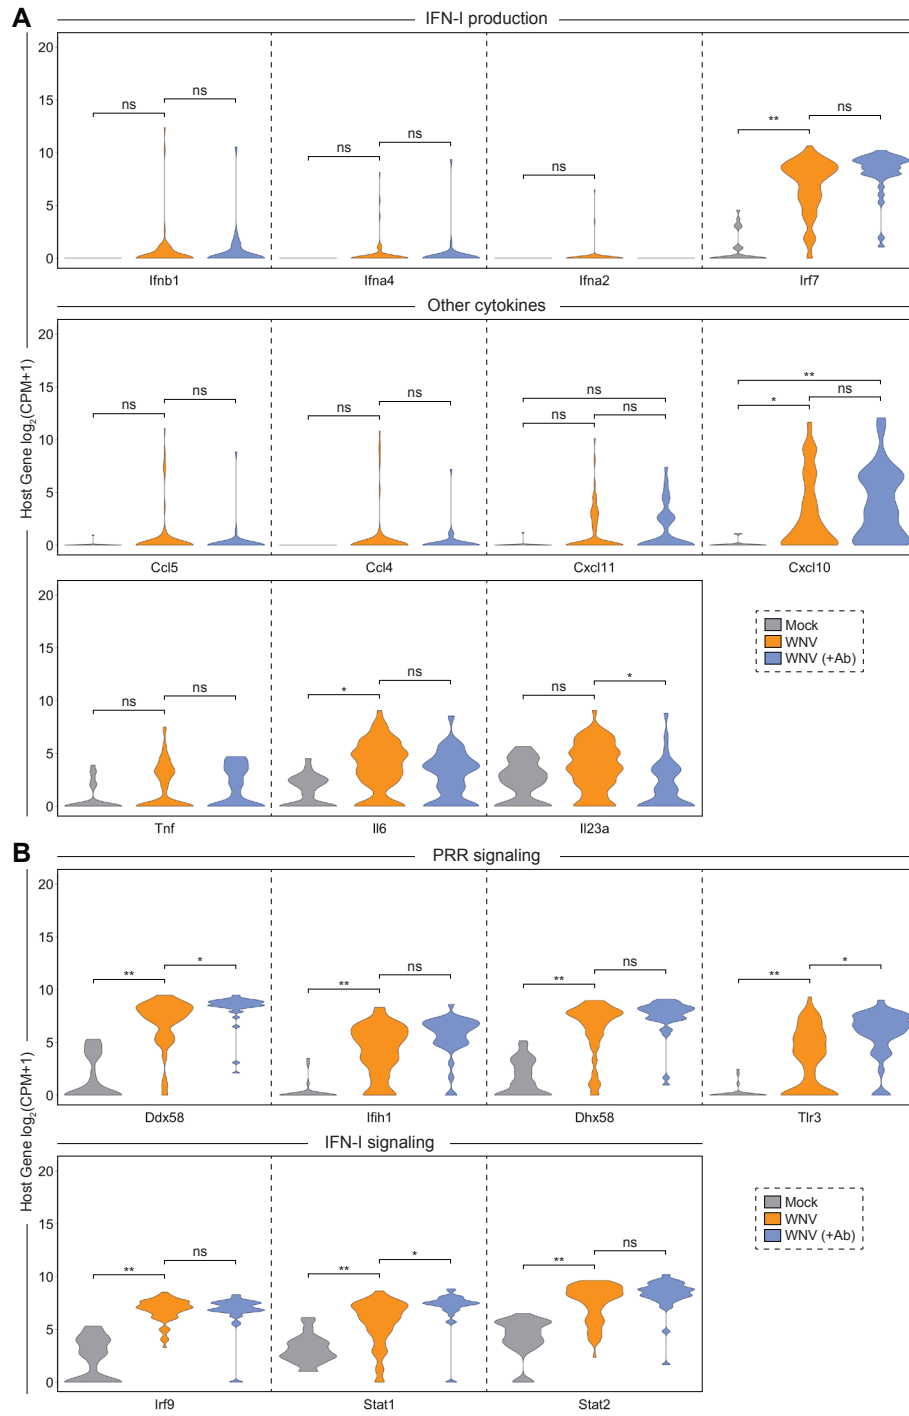

Figure 4

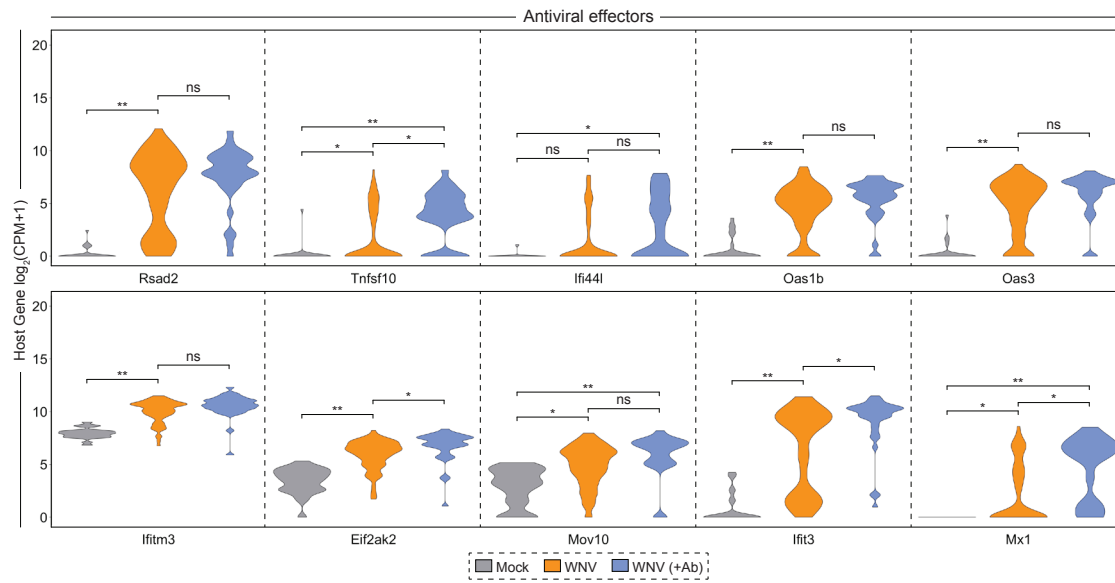

Figure 5

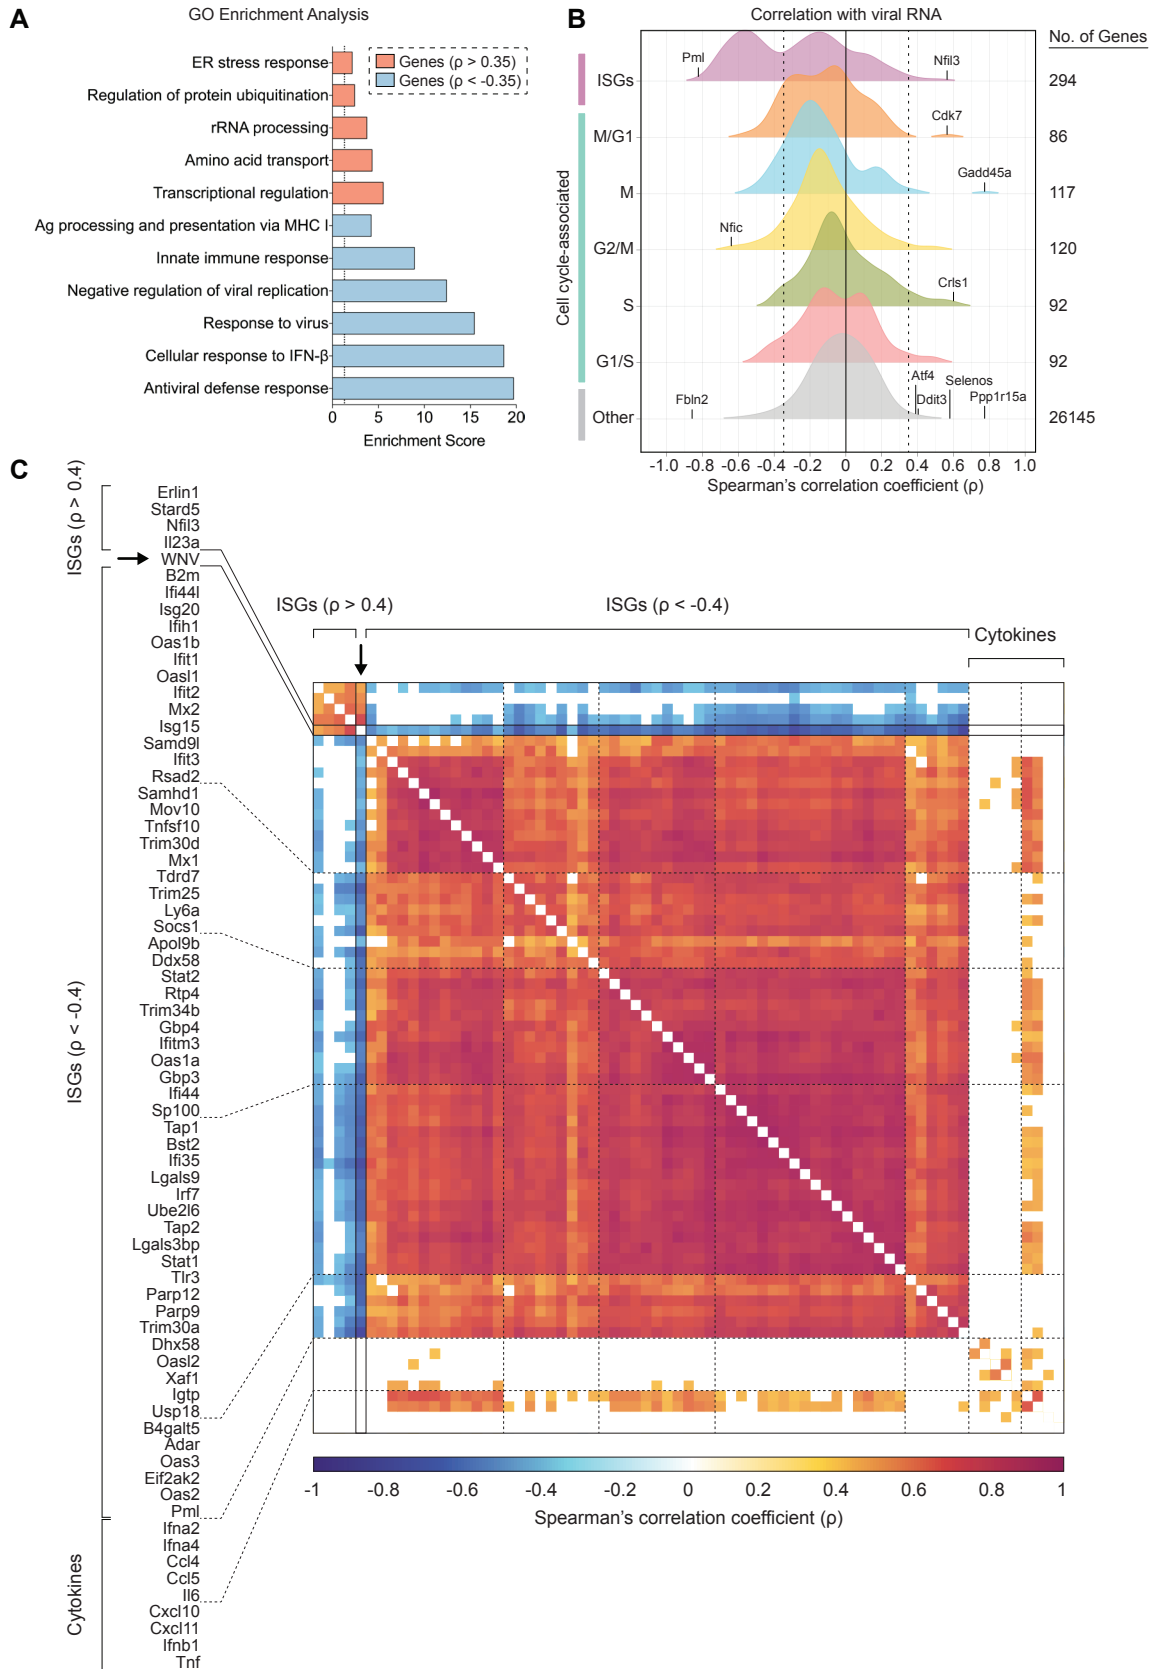

Figure 6

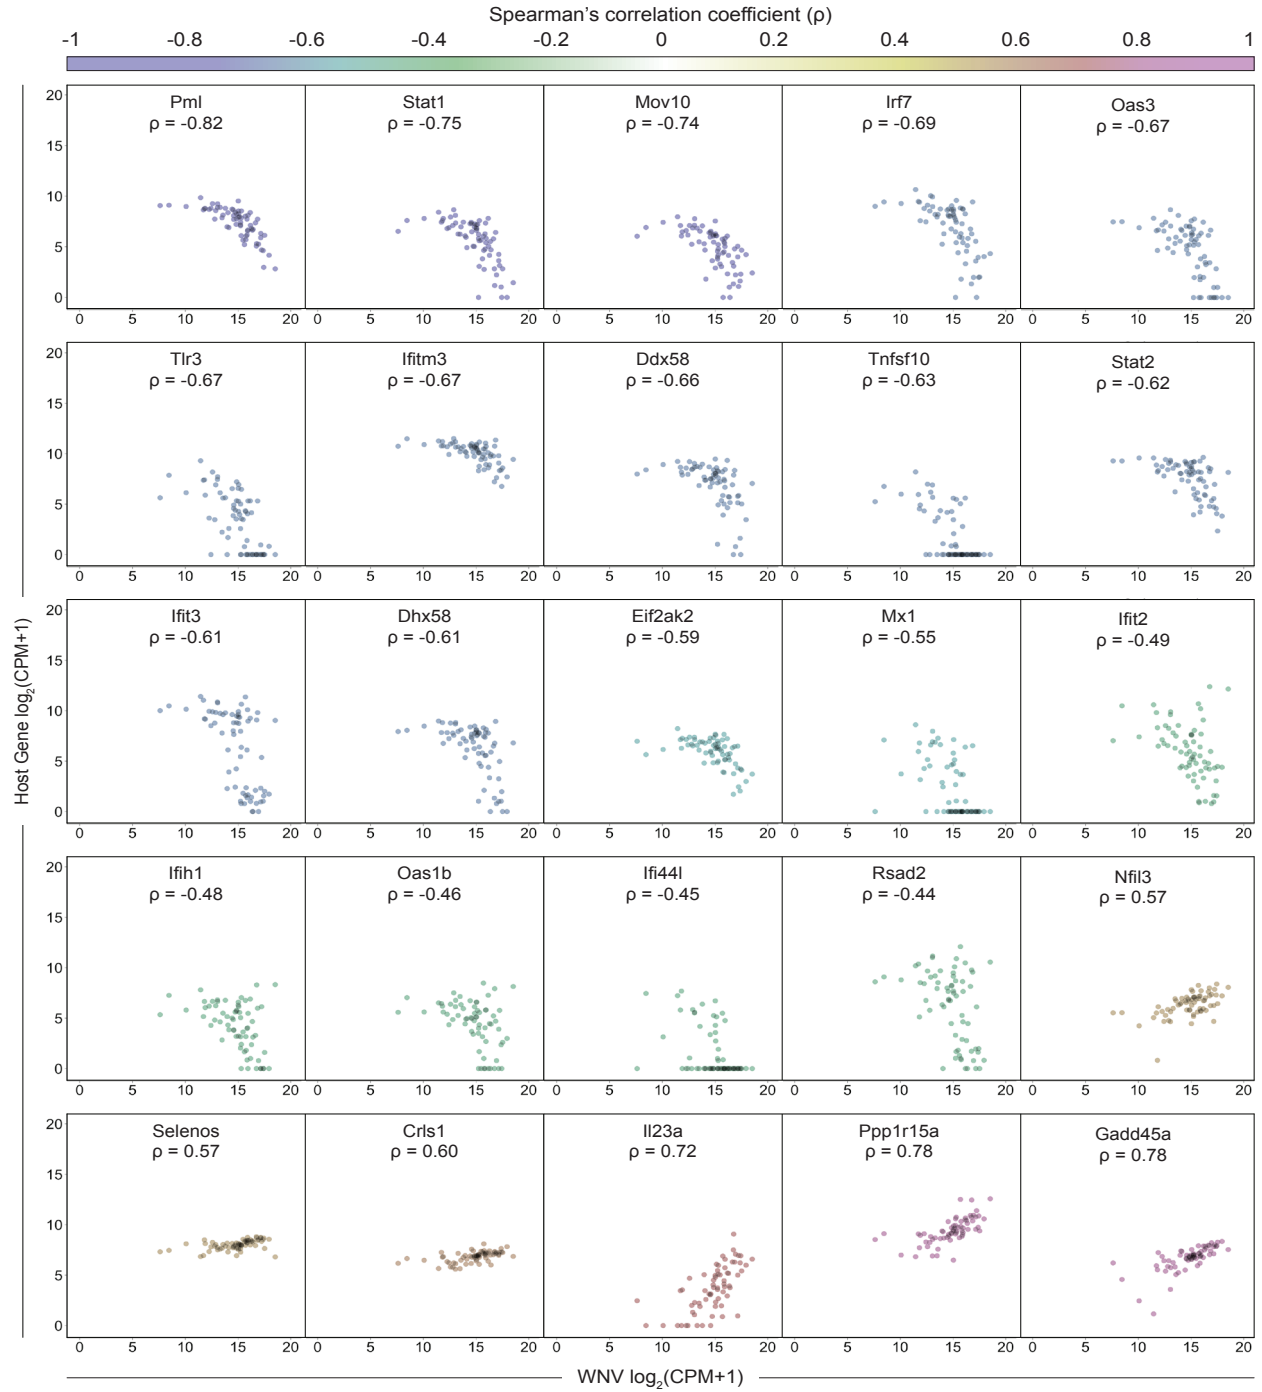

Source: http://biorxiv.org/content/10.1101/434852v1.full.pdf
